# Supplementary material for: Effects of Mint Oils on the Human Oral Microbiome: A Pilot Study
Source: Preprints.org preprint supplement (doi:10.20944/preprints202406.0073.v1), 2024-06-06
Supplement: Supplementary file 1 [file supplementary]

Article

**Effects of Mint Oils on the Human Oral Microbiome: A Pilot Study**

**Supplementary figures**


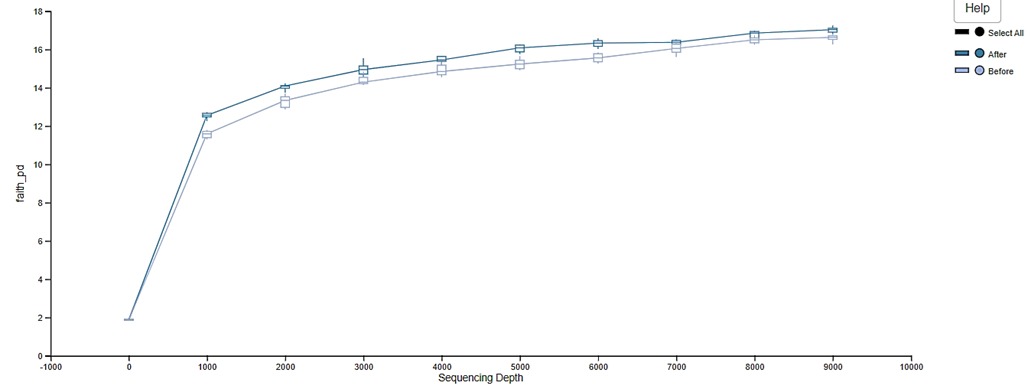


**Figure S1.** Alpha-rarefaction curve.


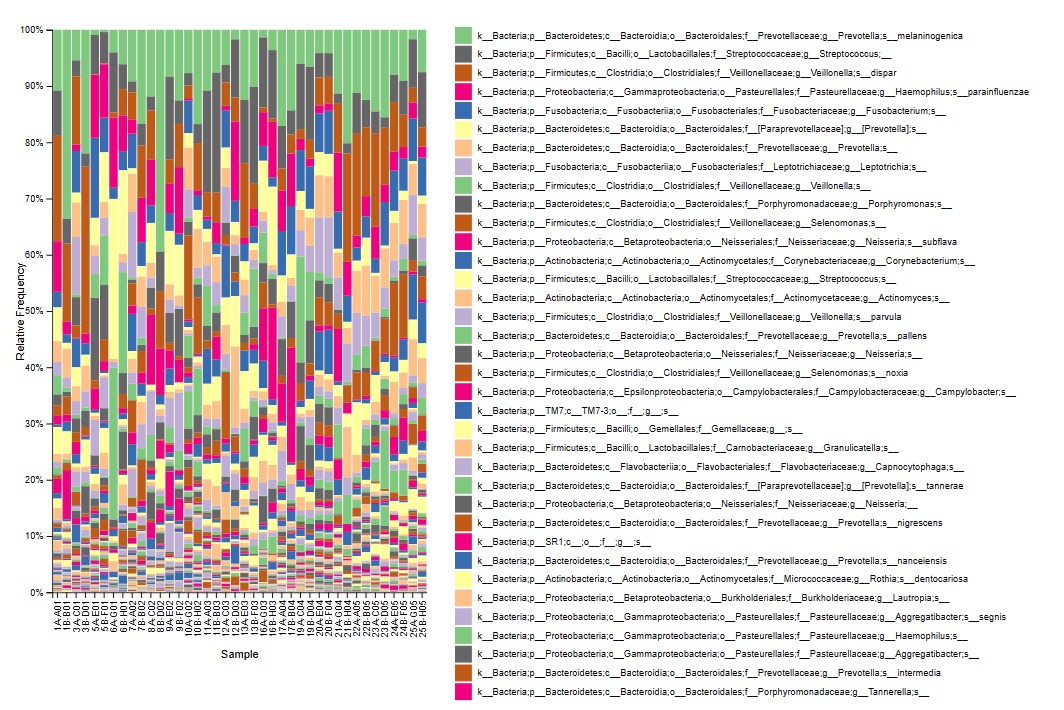
 **Figure S2.** Taxonomic composition of oral microbiome.
